# Supplementary material
Source: publisher site journal article supplement (https://www.dovepress.com/get_supplementary_file.php?f=345592.docx)
Supplement: Supplementary file 1 [file get_supplementary_file.php]

**Table S1** Linear regression, limit of detection (LOD), and limit of quantification (LOQ) of the six tested compounds.

| Analytes | Linear Equation | R2 | Linear Range /µg | LOD (µg/mL) | LOQ (µg/mL) |
| --- | --- | --- | --- | --- | --- |
| Tarasaponin IV | Y=62482x- 10.838 | 0.9991 | 0.570~22.80 | 1.38 | 3.46 |
| Araloside C | Y=60635x+ 14.199 | 0.9995 | 0.524~20.96 | 0.91 | 2.91 |
| Stipuleanoside R2 | Y=40521x+ 30.157 | 0.9991 | 0.770~30.80 | 1.21 | 4.24 |
| Pseudoginsenoside RT1 | Y=36519x+ 21.098 | 0.9992 | 0.704~28.16 | 5.18 | 9.33 |
| Araloside A | Y=49595x+ 39.709 | 0.9993 | 1.016~40.64 | 0.61 | 1.88 |
| Chikusetsu saponin IVa | Y=28501x+ 12.061 | 0.9992 | 0.570~22.80 | 9.74 | 18.51 |

**Table S2**. Precision, stability, and recovery of the six tested compounds.

| Analytes | Precision (RSD, %) | | Stability  (RSD, %) | Recovery | |
| --- | --- | --- | --- | --- | --- |
| Intra-Day | Inter-Day | Mean Recovery (%) | RSD (%) |
| Tarasaponin IV | 1.57 | 2.55 | 1.64 | 99.68 | 1.10 |
| Araloside C | 2.04 | 2.30 | 2.69 | 99.35 | 1.18 |
| Stipuleanoside R2 | 1.96 | 2.61 | 2.55 | 99.56 | 0.71 |
| Pseudoginsenoside RT1 | 2.09 | 2.51 | 2.12 | 99.02 | 1.01 |
| Araloside A | 1.97 | 1.75 | 1.89 | 98.67 | 1.20 |
| Chikusetsu saponin IVa | 1.83 | 2.75 | 2.85 | 98.14 | 1.42 |
